# Supplementary material
Source: Springer Nature journal article supplement (https://www.springermedizin.de/resource/supplementary/13058_2010_9477_MOESM6_ESM.pdf/9702238)
Supplement: MOESM6 [file 9702238]

**A**

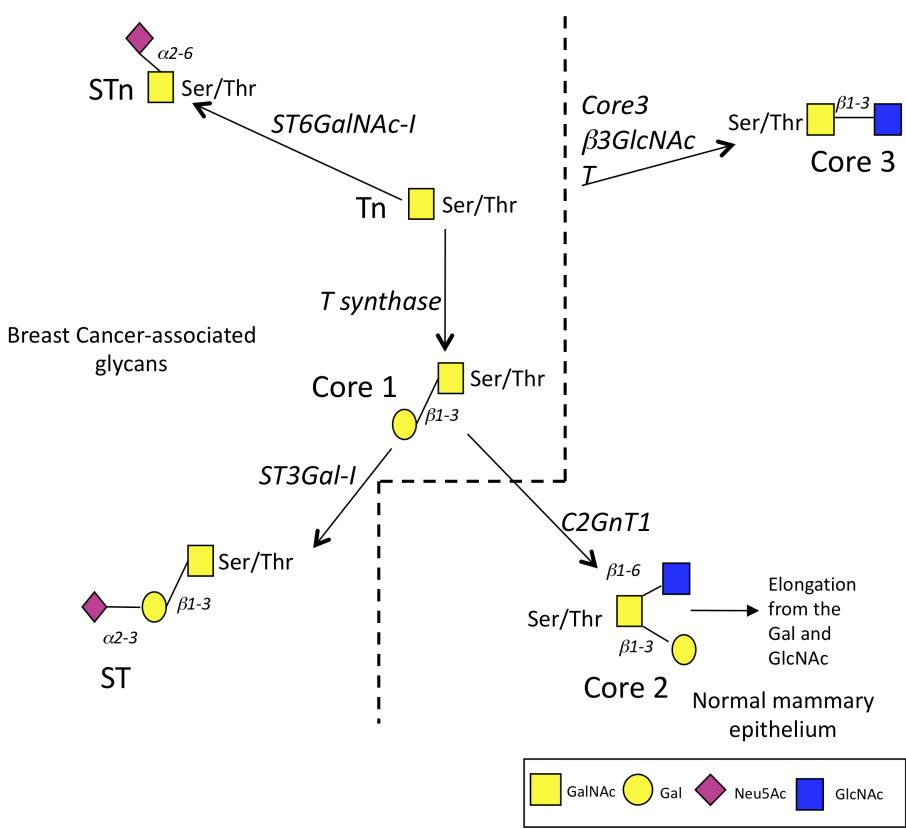

**B**

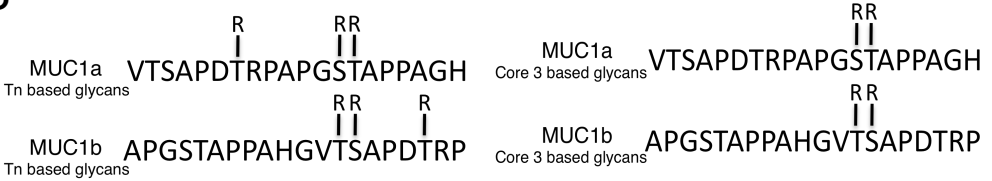

| MUC1a and 1b Glycoforms |                               | Glycan structure -R                                                     |
|-------------------------|-------------------------------|-------------------------------------------------------------------------|
| 1                       | MUC1                          | n/a                                                                     |
| 2                       | Tn-MUC1                       | GalNAc $\alpha$ -                                                       |
| 3                       | STn-MUC1*                     | Neu5Ac $\alpha$ 2-6GalNAc $\alpha$ -                                    |
| 4                       | ST-MUC1                       | Neu5Ac $\alpha$ 2-3Gal $\beta$ 1-3GalNAc $\alpha$ -                     |
| 5                       | Core3-MUC1*                   | GlcNAc $\beta$ 1-3GalNAc $\alpha$ -                                     |
| 6                       | [S6]Core3-MUC1*               | GlcNAc $\beta$ 1-3[Neu5Ac $\alpha$ 2-6]GalNAc $\alpha$ -                |
| 7                       | Le <sup>c</sup> C3-MUC1*      | Gal $\beta$ 1-3GlcNAc $\beta$ 1-3GalNAc $\alpha$ -                      |
| 8                       | S3Le <sup>c</sup> C3-MUC1     | Neu5Ac $\alpha$ 2-3Gal $\beta$ 1-3GlcNAc $\beta$ 1-3GalNAc $\alpha$ -   |
| 9                       | Le <sup>c</sup> [S6]C3-MMUC1* | Gal $\beta$ 1-3GlcNAc $\beta$ 1-3[Neu5Ac $\alpha$ 2-6]GalNAc $\alpha$ - |
| 10                      | C3-Threonine                  | GlcNAc $\beta$ 1-3GalNAc $\alpha$ -Thr                                  |

\*combinational subset
